# Supplementary material for: Residue-by-residue analysis of cotranslational membrane protein integration in vivo
Source: eLife. 2021 Feb 8;10:e64302. doi: 10.7554/eLife.64302 (PMC7886326; doi:10.7554/eLife.64302)
Supplement: Source data 1. [file elife-64302-data1.xlsx]

## Sheet: EmrE
	EmrE(Cout)
	N	R1	R2	R3	AVE	SD	SEM	t-test
	45	0.0264836	0.0400468	0.0315723	0.0327009	0.00685165	0.0039558
	50	0.0610329	0.117033		0.0890327	0.0395977	0.0279998
	55	0.061202	0.0902108	0.103196	0.0848697	0.0215006	0.0124134
	60	0.00332629	0.0299787	0.0312141	0.0215063	0.0157565	0.00909702
	65	0.0346592	0.0853721	0.0419312	0.0539875	0.027422	0.0158321
	70	0.0643089	0.0591289	0.202076	0.108505	0.0810765	0.0468096
	75	0.168349	0.254722	0.146626	0.189899	0.0571791	0.0330124
	80	0.46177	0.472142	0.500001	0.477971	0.0197709	0.0114147
	85	0.501127	0.480511	0.501041	0.494226	0.0118777	0.0068576
	90	0.379799	0.35369	0.442164	0.391884	0.0454582	0.0262453
	95	0.341596	0.383161	0.15545	0.293402	0.121264	0.070012
	100	0.358642	0.43664	0.362308	0.385863	0.0440118	0.0254102
	102	0.406412	0.520493	0.413113	0.446673	0.0640178	0.0369607
	105	0.839563	0.824767	0.772916	0.812415	0.034998	0.0202061
	107	0.907636	0.938318	0.870134	0.905363	0.0341488	0.0197158
	110	0.93721	0.892649	0.886998	0.905619	0.027504	0.0158795
	112	0.850343	0.889471	0.954427	0.89808	0.0525735	0.0303533
	115	0.686573	0.711327	0.725298	0.707733	0.0196109	0.0113224
	117	0.695067	0.878433	0.788127	0.787209	0.0916866	0.0529353
	120	0.904547	0.893696	0.879861	0.892701	0.0123732	0.00714368
	122	0.942914	0.95515	0.887556	0.92854	0.0360167	0.0207943
	125	0.724294	0.63982	0.759481	0.707865	0.0614989	0.0355064
	127	0.726422	0.921111	0.814693	0.820742	0.0974854	0.0562832
	130	0.767797	0.656314	0.716301	0.713471	0.0557955	0.0322136
	132	0.735265	0.813176	0.880081	0.809507	0.0724775	0.0418449
	135	0.738892	0.761037	0.74577	0.748566	0.0113345	0.00654396
	137	0.809696	0.817444	0.877639	0.834926	0.0371927	0.0214732
	140	0.594716	0.512493	0.496316	0.534508	0.0527652	0.030464
	145	0.317398	0.240933	0.286729	0.281686	0.0384811	0.0222171
	150	0.46413	0.396079	0.351197	0.403802	0.0568616	0.0328291
	155	0.207461	0.234499	0.315744	0.252568	0.0563573	0.0325379
	160	0.126093	0.17293	0.138461	0.145828	0.0242721	0.0140135
	165	0.156122	0.14788	0.148728	0.15091	0.0045336	0.00261748
	170	0.133803	0.147655	0.116111	0.132523	0.0158109	0.00912844
	EmrE(Cout,E14L)
	45	0.120818	0.10113	0.0557501	0.0925661	0.0333686	0.0192654
	50	0.336158	0.164576	0.202816	0.234517	0.0900767	0.0520058
	55	0.489606	0.329026	0.42604	0.414891	0.0808684	0.0466894	0.00240188	**
	60	0.216014	0.123254	0.205217	0.181495	0.0507265	0.0292869
	65	0.138283	0.189024	0.179546	0.168951	0.0269788	0.0155762
	70	0.247163	0.226808	0.233683	0.235885	0.0103547	0.00597827
	75	0.382001	0.339916	0.370357	0.364091	0.0217305	0.0125461
	80	0.437631	0.474003	0.441671	0.451102	0.0199354	0.0115097
	85	0.789475	0.607526	0.705653	0.700885	0.0910682	0.0525783	0.0175789	*
	90	0.530657	0.342859	0.41402	0.429179	0.0948124	0.05474
	95	0.376844	0.378788	0.440001	0.398544	0.0359159	0.020736
	100	0.308844	0.342859	0.41402	0.355241	0.0536701	0.0309865
	102	0.499922	0.519105	0.549215	0.522747	0.0248473	0.0143456
	105	0.789117	0.831364	0.808556	0.809679	0.021146	0.0122086	0.913312
	107	0.766594	0.876193	0.894304	0.845697	0.069101	0.0398955
	110	0.91611	0.908725	0.926811	0.917215	0.00909357	0.00525017
	112	0.919964	0.927796	0.940288	0.929349	0.0102508	0.00591832
	115	0.867212	0.847085	0.909986	0.874761	0.0321225	0.0185459	0.00154052	**
	117	0.713302	0.888356	0.788635	0.796764	0.0878097	0.050697
	120	0.83213	0.869943	0.885913	0.862662	0.027621	0.015947
	122	0.919964	0.886072	0.786843	0.864293	0.0691811	0.0399417
	125	0.658256	0.713944	0.772933	0.715044	0.0573461	0.0331088
	127	0.751009	0.844093	0.677895	0.757666	0.083299	0.0480927
	130	0.538228	0.568072	0.640029	0.58211	0.0523319	0.0302139	0.0409699	*
	132	0.758361	0.791381	0.807771	0.785838	0.0251667	0.01453
	135	0.760934	0.796339	0.899698	0.81899	0.0721015	0.0416278
	137	0.655017	0.699214	0.723688	0.69264	0.0348044	0.0200943
	140	0.566587	0.564384	0.742395	0.624455	0.102145	0.0589732
	145	0.306303	0.292104	0.444182	0.34753	0.0840038	0.0484996
	150	0.399696	0.383964	0.464793	0.416151	0.0428533	0.0247414
	155	0.270071	0.244638	0.366941	0.293883	0.0645351	0.0372594
	160	0.217463	0.155809	0.236848	0.203373	0.0423167	0.0244316
	165	0.137182	0.118868	0.176893	0.144314	0.0296626	0.0171257
	170	0.2383	0.250653	0.186659	0.225204	0.0339477	0.0195997
	EmrE(Cout) Ec-Sup1
	100	0.052219	0.0939993	0.0646859	0.0703014	0.0214488	0.0123834
	102	0.103081	0.0921341	0.128639	0.107951	0.0187333	0.0108157
	105	0.14353	0.0557435	0.128415	0.10923	0.0469329	0.0270967
	107	0.100052	0.0644609	0.139275	0.101263	0.0374219	0.0216055
	110	0.0822991	0.159613	0.152838	0.131583	0.0428155	0.0247196
	112	0.0512378	0.0927139	0.0963104	0.0800873	0.0250491	0.0144621
	115	0.0787294	0.0604693	0.10053	0.0799094	0.0200562	0.0115795
	117	0.041629	0.0862556	0.122468	0.0834507	0.0404922	0.0233782
	120	0.0628539	0.0651215	0.16503	0.0976686	0.058348	0.0336872
	122	0.041629	0.0920202	0.060606	0.0647517	0.0254501	0.0146936
	125	0.0578791	0.0605732	0.081913	0.0667885	0.0131673	0.00760216
	127	0.074982	0.0392718	0.0705026	0.0615855	0.0194536	0.0112315
	130	0.0537094	0.100863	0.15963	0.104734	0.0530661	0.0306377
	132	0.126168	0.134154	0.139171	0.133164	0.0065582	0.00378638
	135	0.181316	0.103411	0.158341	0.147689	0.0400298	0.0231112
	137	0.200867	0.181597	0.159276	0.18058	0.0208141	0.012017
	140	0.189761	0.155472	0.247964	0.197732	0.0467587	0.0269961
	145	0.125439	0.117156	0.179042	0.140545	0.0335948	0.019396
	EmrE(Cout,E14A)
	130	0.569094	0.57285	0.629175	0.590373	0.0336557	0.0194311	0.030728	*
	115	0.830811	0.841763	0.86103	0.844534	0.0152988	0.00883275	0.000677909	***
	105	0.828368	0.816287	0.770548	0.805068	0.030499	0.0176086	0.797552
	85	0.695061	0.757527	0.712115	0.721568	0.0322879	0.0186414	0.000332517	***
	55	0.249889	0.275914	0.295548	0.273784	0.0229039	0.0132236	0.000479889	***
	EmrE(Cout,E14D)
	130	0.934001	0.715832	0.875739	0.841857	0.112962	0.0652187	0.152327
	115	0.851547	0.810591	0.835506	0.832548	0.0206377	0.0119152	0.00161337	**
	105	0.873779	0.828653	0.863337	0.855256	0.0236236	0.0136391	0.153695
	85	0.495695	0.575012	0.664161	0.578289	0.0842805	0.0486594	0.162313
	55	0.0819	0.0965377	0.0998125	0.0927501	0.00953802	0.00550678	0.592838
	EmrE(Cout,E14Q)
	130	0.668702	0.83415	0.623724	0.708859	0.110811	0.063977	0.951751
	115	0.866011	0.868595	0.854233	0.862946	0.00765584	0.0044201	0.000216691	***
	105	0.83068	0.786573	0.836942	0.818065	0.0274521	0.0158495	0.836652
	85	0.685897	0.744013	0.719283	0.716398	0.0291652	0.0168385	0.000257491	***
	55	0.0961566	0.116202	0.0900944	0.100817	0.0136634	0.00788857	0.339214

## Sheet: GlpG
	GlpG(Ec)	Note that constructs marked LepB-GlpG have 58 residues from LepB fused to the N-terminus (see Fig. 3a)
	N	R1	R2	R3	AVE	SD	SEM
	46	0.017687	0.032119		0.024903	0.010205	0.00721602
	51	0.0287489	0.0182592		0.023504	0.0074173	0.00524482
	56	0.0423325	0.0420598		0.0421962	0.000192843	0.000136361
	61	0.25365	0.229115		0.241382	0.0173485	0.0122672
	66	0.172141	0.178141		0.175141	0.00424275	0.00300007
	71	0.0456614	0.0605254		0.0530934	0.0105104	0.00743196
	76	0.103995	0.131185		0.11759	0.0192262	0.013595
	81	0.0685386	0.0756677		0.0721032	0.00504105	0.00356456
	86	0.660758	0.685612	0.74517	0.69718	0.043379	0.0250449
	91	0.917521	0.915653	0.904383	0.912519	0.00710729	0.0041034
	96	0.777213	0.807709	0.867312	0.817411	0.0458267	0.0264581
	101	0.28444	0.267995	0.547693	0.366709	0.156952	0.0906163
	106	0.15089	0.167173	0.325589	0.214551	0.0965059	0.0557177
	111	0.159671	0.174803	0.334549	0.223008	0.0968935	0.0559415
	116	0.112287	0.0982675		0.105277	0.00991342	0.00700985
	121	0.159671	0.174803		0.167237	0.0106994	0.00756563
	126	0.0685865	0.0786151		0.0736008	0.00709131	0.00501431
LepB-GlpG	131	0.0517231	0.0710932		0.0614081	0.0136967	0.00968506
LepB-GlpG	136	0.0690418	0.0738269		0.0714343	0.00338358	0.00239255
LepB-GlpG	141	0.143454	0.239821	0.179122	0.187466	0.048722	0.0281296
LepB-GlpG	146	0.472263	0.459684	0.473377	0.468442	0.00760428	0.00439033
LepB-GlpG	151	0.862884	0.857934	0.853845	0.858221	0.00452638	0.00261331
LepB-GlpG	156	0.559949	0.54867	0.569447	0.559356	0.0104015	0.00600528		GlpG(Ec) - no LepB (see Supplementary Figure S3a)
LepB-GlpG	161	0.645889	0.631572		0.63873	0.0101236	0.00715847		R1	R2	R3	AVE	SD	SEM
LepB-GlpG	166	0.193778	0.216058		0.204918	0.0157544	0.0111401		0.186559	0.177371	0.143488	0.169139	0.0226848	0.0130971
LepB-GlpG	168	0.333893	0.30782		0.320857	0.0184367	0.0130367
LepB-GlpG	169	0.249581	0.25506		0.25232	0.00387423	0.00273949
LepB-GlpG	170	0.29123	0.30791		0.29957	0.0117947	0.00834011
LepB-GlpG	171	0.344547	0.372144		0.358345	0.019514	0.0137984		0.363532	0.333007	0.265528	0.320689	0.0501502	0.0289542
LepB-GlpG	172	0.304044	0.315701		0.309872	0.00824309	0.00582874
LepB-GlpG	173	0.268165	0.245811		0.256988	0.0158066	0.011177
LepB-GlpG	174	0.271291	0.265607		0.268449	0.00401931	0.00284208
LepB-GlpG	175	0.274937	0.257882		0.266409	0.0120592	0.00852717
LepB-GlpG	176	0.188241	0.277287		0.232764	0.0629647	0.0445228		0.151755	0.270383	0.220068	0.214069	0.059541	0.034376
LepB-GlpG	178	0.237899	0.214497		0.226198	0.0165476	0.0117009
LepB-GlpG	179	0.296187	0.324456		0.310322	0.0199896	0.0141348
LepB-GlpG	180	0.222626	0.243697		0.233161	0.0149	0.0105359
LepB-GlpG	181	0.276892	0.301597		0.289244	0.0174697	0.0123529		0.386785	0.465372	0.347407	0.399855	0.060059	0.0346751
LepB-GlpG	182	0.331423	0.315888		0.323656	0.010985	0.00776755
LepB-GlpG	183	0.475789	0.445777		0.460783	0.0212221	0.0150063
LepB-GlpG	184	0.492545	0.413262		0.452903	0.0560614	0.0396414
LepB-GlpG	185	0.695958	0.658193		0.677076	0.0267044	0.0188829
LepB-GlpG	186	0.816438	0.808044		0.812241	0.00593576	0.00419722		0.911098	0.904532	0.873831	0.896487	0.0198934	0.0114855
LepB-GlpG	187	0.784787	0.758101		0.771444	0.0188695	0.0133428
LepB-GlpG	188	0.78295	0.764828		0.773889	0.0128144	0.00906114
LepB-GlpG	192	0.81268			0.81268
LepB-GlpG	193	0.753759	0.822881		0.78832	0.0488766	0.034561
LepB-GlpG	194	0.739833	0.810493		0.775163	0.0499645	0.0353303
LepB-GlpG	195	0.711313	0.859285		0.785299	0.104633	0.0739864
LepB-GlpG	196	0.831223	0.813671		0.822447	0.0124106	0.0087756		0.915509	0.938888	0.90436	0.919586	0.0176212	0.0101736
LepB-GlpG	197	0.82227	0.866685		0.844478	0.0314059	0.0222073
LepB-GlpG	198	0.82989	0.816124		0.823007	0.0097341	0.00688305
LepB-GlpG	199		0.861417		0.861417
LepB-GlpG	200	0.842461	0.8209		0.83168	0.015246	0.0107805
LepB-GlpG	201	0.917735	0.856899		0.887317	0.0430173	0.0304178		0.898627	0.886772	0.885942	0.890447	0.00709605	0.00409691
LepB-GlpG	202	0.804389	0.857909		0.831149	0.0378449	0.0267604
LepB-GlpG	203	0.687793	0.838083		0.762938	0.106271	0.0751449
LepB-GlpG	204	0.69609	0.799956		0.748023	0.0734439	0.0519327
LepB-GlpG	205	0.649876	0.689838		0.669857	0.0282575	0.019981
LepB-GlpG	206	0.629336	0.650924		0.64013	0.0152648	0.0107938		0.697294	0.650924	0.713009	0.687075	0.0322791	0.0186363
LepB-GlpG	207	0.613288	0.699956		0.656622	0.0612832	0.0433338
LepB-GlpG	208	0.663279	0.689838		0.676558	0.0187805	0.0132798
LepB-GlpG	209	0.58815	0.557282		0.572716	0.0218274	0.0154343
LepB-GlpG	210	0.544772	0.546261		0.545517	0.00105298	0.000744569
LepB-GlpG	211	0.312171	0.249905	0.234332	0.265469	0.0411878	0.0237798		0.312171	0.330189	0.249905	0.297422	0.0421254	0.0243211
LepB-GlpG	212	0.245202	0.268129		0.256666	0.0162116	0.0114633
LepB-GlpG	213	0.310305	0.294633		0.302469	0.0110822	0.00783632
LepB-GlpG	214	0.350249	0.295839		0.323044	0.0384736	0.0272049
LepB-GlpG	215	0.264101	0.253907		0.259004	0.00720819	0.00509696
LepB-GlpG	216	0.268439	0.221751	0.239247	0.243146	0.0235868	0.0136178		0.268439	0.272948	0.221751	0.254379	0.0283467	0.016366
LepB-GlpG	217	0.32411	0.333798		0.328954	0.00685059	0.0048441
LepB-GlpG	218	0.302469	0.33339		0.317929	0.0218649	0.0154609
LepB-GlpG	219	0.311486	0.322299		0.316892	0.00764555	0.00540622
LepB-GlpG	220	0.346053	0.332587		0.33932	0.00952169	0.00673285
LepB-GlpG	221	0.32193	0.310448	0.323202	0.318527	0.00702553	0.00405619		0.32193	0.291299	0.310448	0.307892	0.0154746	0.00893424
LepB-GlpG	222	0.377398	0.330535		0.353967	0.0331369	0.0234313
LepB-GlpG	223	0.294228	0.295006		0.294617	0.000550233	0.000389073
LepB-GlpG	224	0.311498	0.374739		0.343118	0.0447177	0.0316202
	226	0.426442	0.558204	0.567345	0.51733	0.0788441	0.0455207
	231	0.6265	0.589996	0.641425	0.619307	0.0264581	0.0152756
	236	0.313516	0.275011	0.274277	0.287601	0.0224456	0.012959
	241	0.214495	0.22317	0.229612	0.222426	0.00758561	0.00437956
	246	0.527718	0.564025	0.534257	0.542	0.0193527	0.0111733
	251	0.32756	0.230889	0.20063	0.253026	0.0662976	0.0382769
	256	0.313269	0.200737	0.156558	0.223521	0.0808019	0.046651
	261	0.152993	0.301377	0.262203	0.238858	0.0768972	0.0443966
	266	0.268877	0.313223	0.363482	0.315194	0.0473333	0.0273279
	271	0.529335	0.509361	0.559641	0.532779	0.025316	0.0146162
	276	0.336184	0.284931	0.359689	0.326935	0.0382276	0.0220707
	281	0.320166	0.275857	0.288491	0.294838	0.0228262	0.0131787
	286	0.797056	0.777957	0.761691	0.778901	0.0177011	0.0102197
	291	0.718274	0.816402	0.863248	0.799308	0.0739829	0.042714
	296	0.503921	0.71806	0.693349	0.638443	0.117153	0.0676383
	301	0.406941	0.493031	0.555437	0.485136	0.0745622	0.0430485
	306	0.467821	0.449281	0.479018	0.465373	0.0150187	0.00867106
	311	0.581857	0.612806	0.536377	0.577013	0.0384439	0.0221956
	316	0.408786	0.451558	0.534232	0.464858	0.0637717	0.0368186
	321	0.330375	0.384965	0.302491	0.339277	0.0419518	0.0242209
	326	0.151426	0.122038	0.138892	0.137452	0.0147467	0.00851403
	331	0.229258	0.270243	0.256947	0.252149	0.0209095	0.0120721
	336	0.170321	0.18038	0.142829	0.16451	0.0194382	0.0112227
	LepB-GlpG(Ec-Sup1)
	170	0.0422651	0.0638285		0.0530468	0.0152476	0.0107817
	175	0.0584501	0.0771554		0.0678027	0.0132266	0.00935265
	177	0.048663	0.0725605		0.0606117	0.0168981	0.0119488
	178	0.0750027	0.0777624		0.0763826	0.00195141	0.00137985
	180	0.119399	0.102279		0.110839	0.0121052	0.0085597
	182	0.115303	0.113412		0.114357	0.00133745	0.000945717
	185	0.131157	0.128586		0.129871	0.0018176	0.00128523
	186	0.160076	0.0879348		0.124005	0.0510112	0.0360704
	187	0.145489	0.153701		0.149595	0.00580652	0.00410583
	188	0.1134	0.109047		0.111224	0.00307796	0.00217645
	189	0.0833627	0.0346617		0.0590122	0.0344368	0.0243505
	190	0.134262	0.095821		0.115042	0.0271821	0.0192207
	191	0.113423	0.060166		0.0867946	0.0376585	0.0266286
	192	0.146088	0.0669526		0.106521	0.0559575	0.039568
	193	0.111975	0.0468712		0.0794232	0.0460355	0.032552
	194	0.0653044	0.0375523		0.0514284	0.0196237	0.0138761
	195	0.0639992	0.0503562	0.066565	0.0603068	0.00871242	0.00503012
	196	0.0967935	0.0967674	0.083493	0.0923513	0.00767156	0.00442918
	197	0.126946	0.114422	0.137382	0.12625	0.0114958	0.0066371
	198	0.235703	0.186196		0.210949	0.0350068	0.0247535
	199	0.324204	0.236412	0.218491	0.259702	0.0565746	0.0326634
	200	0.371745	0.331072	0.333601	0.345473	0.0227874	0.0131563
	201	0.216793	0.302755	0.27189	0.263813	0.0435465	0.0251416
	202	0.121545	0.200201	0.219283	0.180343	0.0518067	0.0299106
	203	0.0667135			0.0667135
	204	0.0584499	0.0869964	0.0649246	0.0701237		0.00864093
	LepB-GlpG (Ec-Ms)
	171	0.712363	0.716186		0.714275	0.00270302	0.00191132
	172	0.220178	0.224477		0.222328	0.00303944	0.00214921
	173	0.165685	0.19208		0.178882	0.0186637	0.0131972
	174	0.186294	0.200984		0.193639	0.0103869	0.00734462
	175	0.208116	0.194882		0.201499	0.00935783	0.00661699
	176	0.213458	0.226111		0.219785	0.00894718	0.00632661
	177	0.245992	0.27988		0.262936	0.0239627	0.0169442
	178	0.223101	0.24017		0.231636	0.0120701	0.00853482
	179	0.250345	0.270905		0.260625	0.0145381	0.01028
	180	0.227747	0.270251		0.248999	0.0300546	0.0212518
	181	0.327875	0.320373		0.324124	0.00530446	0.00375082
	182	0.403646	0.39874		0.401193	0.00346889	0.00245287
	183	0.590781	0.627409		0.609095	0.0258999	0.018314
	184	0.633302	0.621652		0.627477	0.00823787	0.00582505
	185	0.764981	0.766705		0.765843	0.00121881	0.000861827
	186	0.771803	0.782251		0.777027	0.00738783	0.00522398
	187	0.775921	0.798868		0.787394	0.0162257	0.0114733
	188	0.756173	0.769284		0.762728	0.00927051	0.00655524
	190	0.587915	0.603261		0.595588	0.010851	0.00767282
	191	0.737365	0.737906		0.737636	0.000382247	0.000270289
	192	0.758487	0.755796		0.757142	0.00190298	0.00134561
	193	0.730347	0.752303		0.741325	0.0155251	0.0109779
	194	0.640761	0.605099		0.62293	0.0252167	0.0178309
	196	0.57681	0.473632		0.525221	0.072958	0.0515891
	197	0.548096	0.569675		0.558885	0.0152592	0.0107899
	198	0.800713	0.784775		0.792744	0.0112696	0.0079688
	199	0.888048	0.890103		0.889075	0.00145326	0.00102761
	200	0.92632	0.923512		0.924916	0.00198507	0.00140365
	201	0.887503	0.910117		0.89881	0.0159907	0.0113071
	202	0.835591	0.8599		0.847745	0.0171888	0.0121543
	203	0.759804	0.741841		0.750823	0.0127016	0.00898141
	204	0.567792	0.625591		0.596691	0.0408702	0.0288996
	205	0.563522	0.558712		0.561117	0.00340151	0.00240523
	206	0.47683	0.502469		0.48965	0.018129	0.0128191
	207	0.44905	0.495856		0.472453	0.0330966	0.0234029
	209	0.418231	0.404986		0.411608	0.00936556	0.00662245
	210	0.318389	0.319247		0.318818	0.000606909	0.00042915
	211	0.394188	0.359834		0.377011	0.0242921	0.0171771
	LepB-GlpG (Y138F139L143→NNN; Ec-Ms)
	182	0.194911	0.169949		0.18243	0.0176509	0.0124811
	183	0.172322	0.192057		0.18219	0.0139545	0.00986733
	184	0.224561	0.252227		0.238394	0.019563	0.0138332
	185	0.340341	0.296867		0.318604	0.0307403	0.0217367
	186	0.368684	0.393564		0.381124	0.0175929	0.0124401
	187	0.348481	0.323021		0.335751	0.0180033	0.0127302
	190	0.406242	0.458112		0.432177	0.0366783	0.0259355
	191	0.270076	0.308522		0.289299	0.027185	0.0192227
	192	0.520825	0.531268		0.526046	0.00738424	0.00522145
	193	0.588075	0.587167		0.587621	0.000642573	0.000454368
	194	0.525679	0.509923		0.517801	0.0111415	0.00787822
	196	0.346358	0.333469		0.339914	0.00911413	0.00644466
	197	0.304337	0.274789		0.289563	0.0208936	0.014774
	198	0.264058	0.293803		0.278931	0.021033	0.0148726
	199	0.300138	0.338354		0.319246	0.0270224	0.0191077
	200	0.258707	0.277388		0.268047	0.013209	0.00934019
	202	0.518497	0.410597		0.464547	0.0762966	0.0539498
	203	0.536953	0.50102		0.518987	0.0254084	0.0179664
	205	0.544527	0.44444		0.494484	0.070772	0.0500434
	206	0.532864	0.528548		0.530706	0.00305122	0.00215754
	207	0.380404	0.531008		0.455706	0.106493	0.0753021
	210	0.517973	0.48932		0.503647	0.0202607	0.0143265
	211	0.367267	0.356765		0.362016	0.00742621	0.00525112
	212	0.381397	0.368672		0.375035	0.00899827	0.00636273
	213	0.313482	0.341096		0.327289	0.0195261	0.013807
	GlpG (F16E; Ec)
	51	0.0524768	0.0202231	0.0115156	0.0280718	0.0215791	0.0124587
	56	0.0781461	0.0180317	0.0117113	0.035963	0.0366681	0.0211703
	61	0.0358754	0.0285312		0.0322033	0.00519317	0.00367212
	76	0.0603677	0.0429252	0.0486257	0.0506395	0.00889396	0.00513493
	81	0.039762	0.0191795	0.0316596	0.0302004	0.0103686	0.00598629
	86	0.0262279	0.0405997	0.0289367	0.0319214	0.00763664	0.00440902
	91	0.0307245	0.0376256	0.0386917	0.0356806	0.00432508	0.00249709
	96	0.0901207	0.0684397	0.043909	0.0674898	0.0231205	0.0133486
	101	0.0584681	0.0556544	0.0549171	0.0563466	0.00187393	0.00108192
	106	0.0215095	0.0374666	0.0359387	0.0316383	0.00880501	0.00508357
	111	0.0326944	0.0362687	0.0446805	0.0378812	0.00615362	0.00355279
	116	0.0570642	0.0541437	0.0299161	0.0470413	0.0149026	0.00860403
	121	0.0484545			0.0484545
	126	0.0330504			0.0330504
	GlpG(Ec) in vitro
	71	0.180335	0.170593	0.164228	0.171719	0.00811254	0.00468378
	76	0.234102	0.23371		0.233906	0.000277371	0.000196131
	81	0.182304	0.17453		0.178417	0.00549709	0.00388703
	86	0.938892	0.852031	0.884718	0.89188	0.0438714	0.0253292
	91	0.883341	0.834545	0.855612	0.857833	0.0244736	0.0141298
	96	0.862145	0.782662	0.843366	0.829391	0.0415437	0.0239853
	101	0.734094	0.594984	0.592064	0.640381	0.0811711	0.0468642
	106	0.351901	0.443778	0.427945	0.407875	0.0491168	0.0283576
	111	0.439493	0.580078	0.616143	0.545238	0.0933366	0.0538879
	116	0.268038	0.336589	0.326217	0.310281	0.0369498	0.021333
	121	0.141951	0.325581	0.348542	0.272025	0.113231	0.0653738
	126	0.267861	0.24458		0.25622	0.0164621	0.0116405
	GlpG (F16E; Ec) in vitro
	71	0.167897	0.16317	0.167064	0.166044	0.00252322	0.00145678
	76	0.18339	0.156804	0.155257	0.16515	0.0158148	0.0091307
	81	0.158739	0.157554	0.151631	0.155975	0.00380777	0.00219842
	86	0.313481	0.257748	0.227992	0.266407	0.0433973	0.0250554
	96	0.317671	0.354491	0.324539	0.332234	0.019579	0.011304
	101	0.329797	0.28142	0.34907	0.320096	0.0348531	0.0201224
	106	0.221994	0.255494	0.25999	0.245826	0.0207615	0.0119866
	121	0.128505	0.133963	0.10882	0.123763	0.0132252	0.0076356
	126	0.154469	0.145066	0.128162	0.142566	0.0133304	0.00769631

## Sheet: BtuC
	BtuC
	N	R1	R2	R3	AVE	SD	SEM	t-test
	43	0.254553	0.206595	0.251651	0.2376	0.0268898	0.0155248
	47	0.177395	0.157874	0.197859	0.17771	0.0199943	0.0115437
	51	0.129931	0.129586	0.176655	0.145391	0.0270761	0.0156324
	59	0.182638	0.178679	0.182666	0.181328	0.00229379	0.00132432
	63	0.585309	0.572481	0.593034	0.583608	0.0103815	0.00599375
	67	0.639818	0.65224	0.678222	0.65676	0.0195968	0.0113142
	71	0.480561	0.550179	0.507786	0.512842	0.0350834	0.0202554
	75	0.481201	0.50755	0.504669	0.497807	0.0144533	0.00834463
	79	0.48388	0.424064	0.493954	0.4673	0.0377801	0.0218124
	83	0.410433	0.468547	0.429076	0.436019	0.0296725	0.0171314
	87	0.25446	0.379907	0.312733	0.3157	0.0627759	0.0362437
	91	0.118959	0.166351	0.179197	0.154836	0.0317275	0.0183179
	95	0.119601	0.170551	0.141856	0.144003	0.0255425	0.014747
	99	0.195262	0.150298	0.186774	0.177445	0.0238895	0.0137926
	103	0.156145	0.169793	0.181461	0.169133	0.0126711	0.00731566
	107	0.180385	0.176167	0.218163	0.191572	0.0231251	0.0133513
	111	0.502749	0.426129	0.493424	0.4741	0.0418058	0.0241366
	115	0.557606	0.53336	0.591646	0.560871	0.0292798	0.0169047
	119	0.662028	0.69104	0.696614	0.683227	0.0185693	0.010721
	123	0.720196	0.710626	0.717235	0.716019	0.00489939	0.00282866
	127	0.685231	0.67399	0.679865	0.679695	0.00562251	0.00324615
	131	0.56257	0.609408	0.613208	0.595062	0.0282031	0.016283
	135	0.323336	0.404383	0.376646	0.368121	0.0411901	0.0237811
	139	0.29949	0.290621	0.335744	0.308619	0.0239064	0.0138023
	143	0.524607	0.501192	0.473557	0.499785	0.0255538	0.0147535
	147	0.262021	0.258804	0.279592	0.266806	0.0111895	0.00646026
	151	0.180312	0.184621	0.189367	0.184767	0.0045295	0.00261511
	155	0.249013	0.304003	0.325664	0.292894	0.039515	0.022814
	159	0.541444	0.488861	0.488632	0.506312	0.030425	0.0175659
	163	0.480255	0.426601	0.434686	0.447181	0.0289269	0.0167009
	167	0.708009	0.670052	0.656693	0.678251	0.0266224	0.0153704
	171	0.678844	0.670322	0.602489	0.650551	0.0418409	0.0241568
	175	0.578544	0.616261	0.649291	0.614699	0.0353995	0.0204379
	179	0.287449	0.316832	0.343312	0.315864	0.0279441	0.0161335
	183	0.404009	0.415509	0.364946	0.394821	0.0265041	0.0153021
	187	0.57656	0.550329	0.548349	0.558413	0.0157477	0.00909196
	191	0.575161	0.588253	0.580939	0.581451	0.00656099	0.00378799
	195	0.500387	0.513754	0.503494	0.505878	0.00699522	0.00403869
	199	0.416214	0.434547	0.432428	0.42773	0.0100288	0.00579011
	203	0.353018	0.432056	0.385968	0.390347	0.0397005	0.0229211
	207	0.290932	0.281532	0.284699	0.285721	0.00478261	0.00276124
	211	0.349395	0.347134	0.345679	0.347403	0.00187271	0.00108121
	215	0.368988	0.375124	0.367573	0.370562	0.0040138	0.00231737
	219	0.315891	0.339284	0.341786	0.33232	0.0142833	0.00824646
	223	0.270042	0.322251	0.329286	0.307193	0.0323653	0.0186861
	227	0.219494	0.277425	0.298259	0.265059	0.0408129	0.0235634
	231	0.913584	0.875345	0.807094	0.865341	0.0539454	0.0311454
	235	0.726	0.737341	0.806	0.756447	0.0432871	0.0249918
	239	0.245	0.287546	0.215	0.249182	0.0364534	0.0210464
	243	0.196	0.203042	0.194	0.197681	0.00474937	0.00274205
	247	0.143	0.172944	0.162	0.159315	0.0151515	0.00874773
	251	0.271	0.23348	0.253	0.252493	0.018765	0.010834
	255	0.598635	0.563816	0.58202	0.58149	0.0174158	0.010055
	259	0.852	0.738094	0.886	0.825365	0.0774672	0.0447257
	263	0.757	0.603615	0.798	0.719538	0.102464	0.0591579
	267	0.411	0.464	0.47	0.448333	0.0324705	0.0187469
	273	0.28	0.313	0.302	0.298333	0.0168028	0.00970109
	277	0.127	0.194	0.181	0.167333	0.0355293	0.0205129
	281	0.298	0.327	0.268	0.297667	0.0295014	0.0170326
	285	0.517	0.533	0.548	0.532667	0.0155027	0.00895048
	289	0.558	0.589	0.551	0.566	0.0202237	0.0116762
	293	0.64	0.32	0.641	0.533667	0.185041	0.106834
	298	0.693009	0.776648	0.81245	0.760702	0.0612962	0.0353894
	302	0.263772	0.259977	0.245997	0.256582	0.00936079	0.00540445
	306	0.170496	0.166554	0.172703	0.169918	0.00311504	0.00179847
	310	0.351593	0.371775	0.397167	0.373512	0.0228363	0.0131845
	314	0.622714	0.709946	0.638079	0.656913	0.0465659	0.0268849
	318	0.478366	0.560684	0.603296	0.547449	0.0635075	0.0366661
	322	0.0832031	0.125159	0.102569	0.103644	0.0209987	0.0121236
	326	0.0721566	0.0540919	0.108066	0.0781048	0.0274744	0.0158623
	332	0.110332	0.111383	0.134942	0.118885	0.013915	0.00803383
	336	0.138281	0.11552	0.145143	0.132981	0.0155061	0.00895245
	340	0.16195	0.103689	0.139036	0.134892	0.0293509	0.0169458
	344	0.310572	0.421419	0.366508	0.366166	0.0554242	0.0319992
	348	0.843282	0.909667	0.930581	0.89451	0.0455803	0.0263158
	352	0.486389	0.478874	0.491634	0.485632	0.00641351	0.00370284
	354	0.481323	0.485696	0.488131	0.48505	0.00344954	0.00199159
	358	0.228029	0.241965	0.238061	0.236018	0.00718919	0.00415068
	362	0.250562	0.253271	0.255255	0.253029	0.00235574	0.00136009
	366	0.205232	0.187719	0.16692	0.186624	0.0191791	0.0110731
	370	0.165879	0.163142	0.17404	0.167687	0.00566935	0.0032732
	374	0.159828	0.17341	0.239929	0.191056	0.0428673	0.0247494
	378	0.11371	0.164252	0.130475	0.136146	0.0257438	0.0148632
	382	0.16358	0.163048	0.141697	0.156108	0.0124833	0.00720726
	386	0.0967624	0.0888368	0.0981813	0.0945935	0.00503566	0.00290734
	R47R56R59 to QQQ
	99	0.159185	0.156292	0.191261	0.168913	0.019408	0.0112052
	107	0.811325	0.765123	0.740806	0.772418	0.0358211	0.0206813
	111	1	0.860803	0.902186	0.920996	0.0714797	0.0412688
	123	1	1	1	1	0	0
	135	0.335156	0.384584	0.369939	0.363226	0.0253887	0.0146582
	Hydrophobic residue mutations
	67	0.134743	0.21497	0.199101	0.182938	0.0424858	0.0245292	6.20325e-05	***
	111	0.259758	0.282871	0.205585	0.249405	0.0396695	0.0229032	0.00250729	**
	123	0.69036	0.680808	0.686624	0.685931	0.00481373	0.00277921	0.00161836	**
	143	0.317847	0.282835	0.324306	0.308329	0.0223138	0.0128829	0.000613762	***
	167	0.271969	0.176661	0.262322	0.236984	0.0524638	0.03029	0.000202579	***
	191	0.554639	0.531096	0.571207	0.552314	0.0201566	0.0116374	0.0759209
	199	0.330457	0.368611	0.311267	0.336778	0.0291897	0.0168527	0.00696321	**
	259	0.598711	0.581984	0.615311	0.598669	0.0166635	0.00962068	0.00773233	**
	289	0.393073	0.443247	0.36197	0.39943	0.0410094	0.0236768	0.00322625	**
	298	0.396541	0.493895	0.511191	0.467209	0.0618081	0.0356849	0.00428646	**
	314	0.301228	0.390904	0.398678	0.363603	0.0541583	0.0312683	0.00206458	**
	348	0.81771	0.733647	0.731112	0.760823	0.0492817	0.0284528	0.0260691	*
	TMH2
	101*	0.530551	0.47198	0.540858	0.514463	0.0371507	0.021449
	105*	0.759979	0.847436	0.855666	0.821027	0.0530292	0.0306164
	109*	0.795051	0.857152	0.894663	0.848955	0.050309	0.0290459
	115*	0.75757	0.814778	0.810195	0.794181	0.031789	0.0183534
	121*	0.898442	0.940539	0.970549	0.93651	0.0362219	0.0209127
	127*	0.892952	0.951734	0.932788	0.925825	0.0300032	0.0173224
	133*	0.599097	0.634641	0.662091	0.631943	0.0315834	0.0182347
	139*	0.154588	0.136718	0.194746	0.162018	0.0297189	0.0171582
	145*	0.164481	0.15278	0.168176	0.161812	0.00803714	0.00464024
	TMH6
	226*	0.449417	0.538704	0.294694	0.427605	0.123459	0.0712788
	230*	0.653328	0.786378	0.651031	0.696912	0.0774883	0.0447379
	234*	0.746124	0.807933	0.805445	0.786501	0.0349891	0.020201
	240*	0.730008	0.854986	0.868103	0.817699	0.0762257	0.0440089
	246*	0.785151	0.91407	0.950811	0.883344	0.0869989	0.0502288
	252*	0.812005	1	1	0.937335	0.108539	0.0626651
	258*	0.760798	0.938567	0.935071	0.878145	0.101641	0.0586824
	264*	0.121915	0.314972	0.191392	0.209426	0.0977842	0.0564558
	270*	0.162751	0.2579	0.217611	0.212754	0.0477604	0.0275745
	TMH8
	287*	0.383802	0.42741	0.419835	0.410349	0.0233004	0.0134525
	291*	0.392923	0.448077	0.414572	0.418524	0.027789	0.016044
	293*	0.709	0.72	0.724	0.717667	0.00776745	0.00448454
	295*	1	1	1	1	0	0
	297*	1	0.918	0.943	0.953667	0.0420278	0.0242647
	301*	0.806	0.826	0.846	0.826	0.02	0.011547
	307*	0.338	0.368	0.351	0.352333	0.0150444	0.00868588
	309*	0.496	0.483	0.464	0.481	0.0160935	0.00929157
	313*	0.341	0.349	0.36	0.35	0.00953939	0.00550757
	319*	0.366	0.383	0.311	0.353333	0.0376342	0.0217281
	323*	0.325	0.399	0.356	0.36	0.0371618	0.0214554
	325*	0.234	0.242	0.252	0.242667	0.0090185	0.00520683
	329*	0.199	0.245	0.262	0.235333	0.0325935	0.0188178
	TMH10
	346*	0.830761	0.788418	0.823104	0.814094	0.0225636	0.0130271
	350*	0.838601	0.812755	0.782396	0.811251	0.0281326	0.0162424
	354*	0.837366	0.823201	0.769874	0.810147	0.0355892	0.0205474
	360*	0.308554	0.310645	0.311939	0.310379	0.00170836	0.000986324
	366*	0.282935	0.201146	0.165897	0.21666	0.0600412	0.0346648
	372*	0.607306	0.377175	0.4155	0.466661	0.123301	0.0711877
	378*	0.469443	0.355008	0.355867	0.393439	0.065823	0.0380029
	384*	0.333838	0.235423	0.226355	0.265205	0.0596101	0.0344159
	390*	0.157976	0.226625	0.205305	0.196635	0.0351359	0.0202857
	TMH5-6
	226*	0.52302	0.568641	0.534884	0.542182	0.0236697	0.0136657
	230*	1	1	1	1	0	0
	234*	1	1	1	1	0	0
	240*	0.541915	0.499549	0.548141	0.529869	0.0264414	0.0152659
	246*	0.572371	0.600974	0.55094	0.574762	0.0251027	0.0144931
	252*	1	1	1	1	0	0
	258*	1	0.843403	0.813215	0.885539	0.100269	0.0578901
	264*	0.234798	0.161348	0.148836	0.181661	0.0464419	0.0268132
	270*	0.267376	0.19472	0.211936	0.224677	0.0379666	0.02192
	ΔTMH1-4
	179*	0.127908	0.110667	0.192778	0.143785	0.0432965	0.0249973
	191*	0.132898	0.179519	0.216412	0.176277	0.0418515	0.024163
	203*	0.258373	0.272733		0.265553	0.0101539	0.00586235
	215*	1	1	1	1	0	0
	227*	0.283031	0.360727	0.423899	0.355886	0.0705587	0.0407371
	231*	1	1	1	1	0	0
	247*	0.200344	0.207026	0.197741	0.201704	0.00478925	0.00276508
	259*	1	1	1	1	0	0
	277*	0.156976	0.218401	0.178872	0.18475	0.0311314	0.0179737
	289*	0.454805	0.500532	0.464246	0.473194	0.0241412	0.0139379
	298*	0.969529	0.889665	1	0.953065	0.0569805	0.0328977
	306*	0.242944	0.130652	0.266158	0.213251	0.0724689	0.0418399
	314*	0.774725	0.631511	0.655247	0.687161	0.0767558	0.044315
	322*	0.0562126	0.0627784	0.100108	0.073033	0.0236762	0.0136695
	336*	0.187476	0.0857108	0.313197	0.195461	0.113953	0.0657908
	348*	0.755151	1	0.95859	0.90458	0.131056	0.0756651
	358*	0.0826522	0.342994	0.253439	0.226362	0.132266	0.0763639
	366*	0.100874	0.258433	0.206008	0.188438	0.0802354	0.0463239
	374*	0.0754262	0.174773	0.188699	0.1463	0.0617718	0.035664
	382*	0.139549	0.0258376	0.108569	0.0913185	0.0587857	0.03394
	BtuC HA (without N-terminal LepB)
	51		0.0973188	0.149596	0.123457	0.0369655	0.021342
	67	0.649715	0.708341	0.730284	0.696113	0.0416533	0.0240486
	79	0.521423	0.631761	0.651376	0.60152	0.0700561	0.0404469
	99	0.0458899	0	0	0.0152966	0.0264945	0.0152966
	111	0.644701	0.786221	0.699688	0.710203	0.0713432	0.04119
	123	0.883415	0.914702	0.926101	0.908073	0.0221016	0.0127603
	135	0.514721	0.521478	0.556864	0.531021	0.0226345	0.013068
	143	0.538601	0.588978	0.578676	0.568752	0.0266147	0.015366
