# Supplementary material for: Residue-by-residue analysis of cotranslational membrane protein integration in vivo
Source: eLife journal article supplement (doi:10.7554/elife.64302), 2021-02-08
Supplement: supp [file elife_poa_e64302_Figure_1_figure_supplement_1.pdf › elife_poa_e64302_Figure_1_figure_supplement_1.pdf]

# EmrE(C<sub>out</sub>)

a

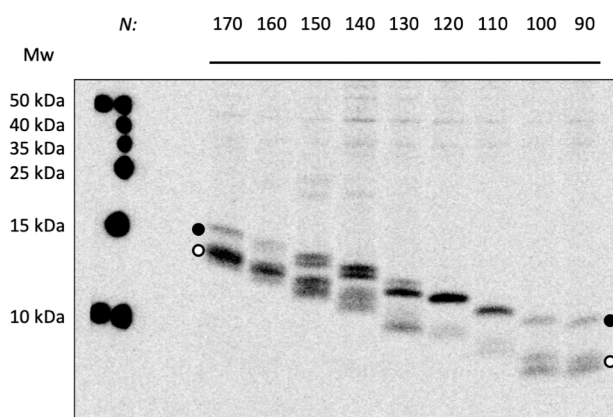

b

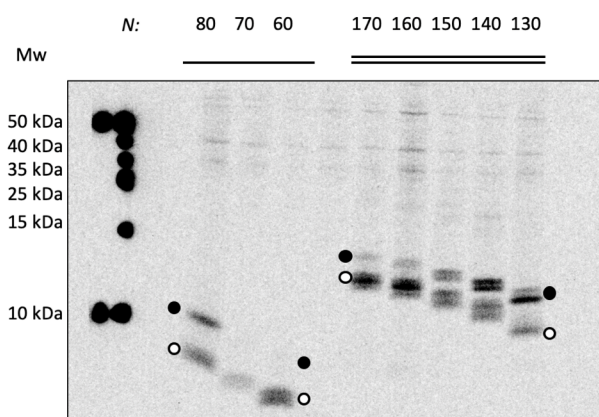

c

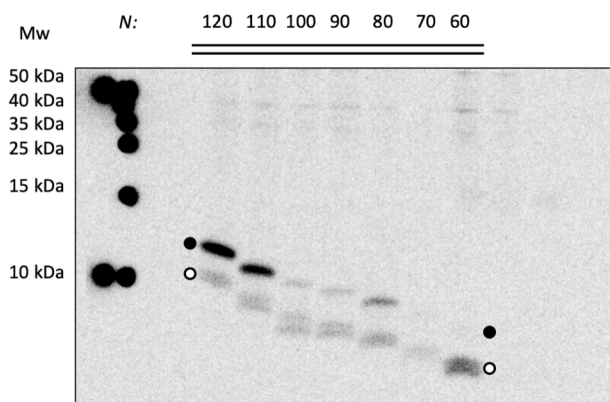

# EmrE(C<sub>out</sub>,E14L)

d

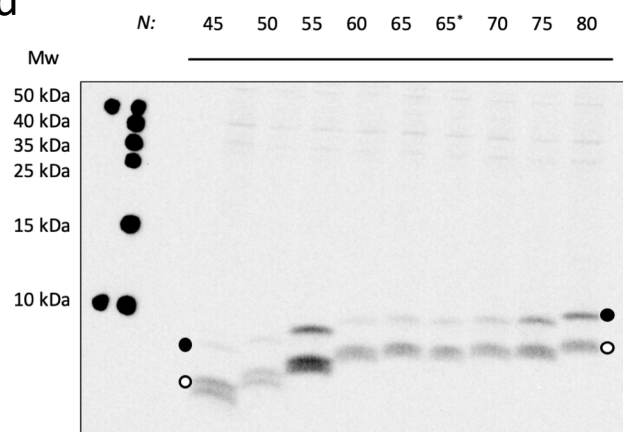

\*duplicate

e

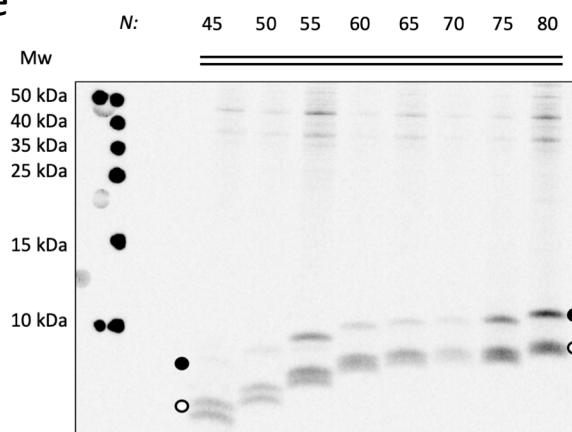

Figure 1-figure supplement 1, part 1

# GlpG

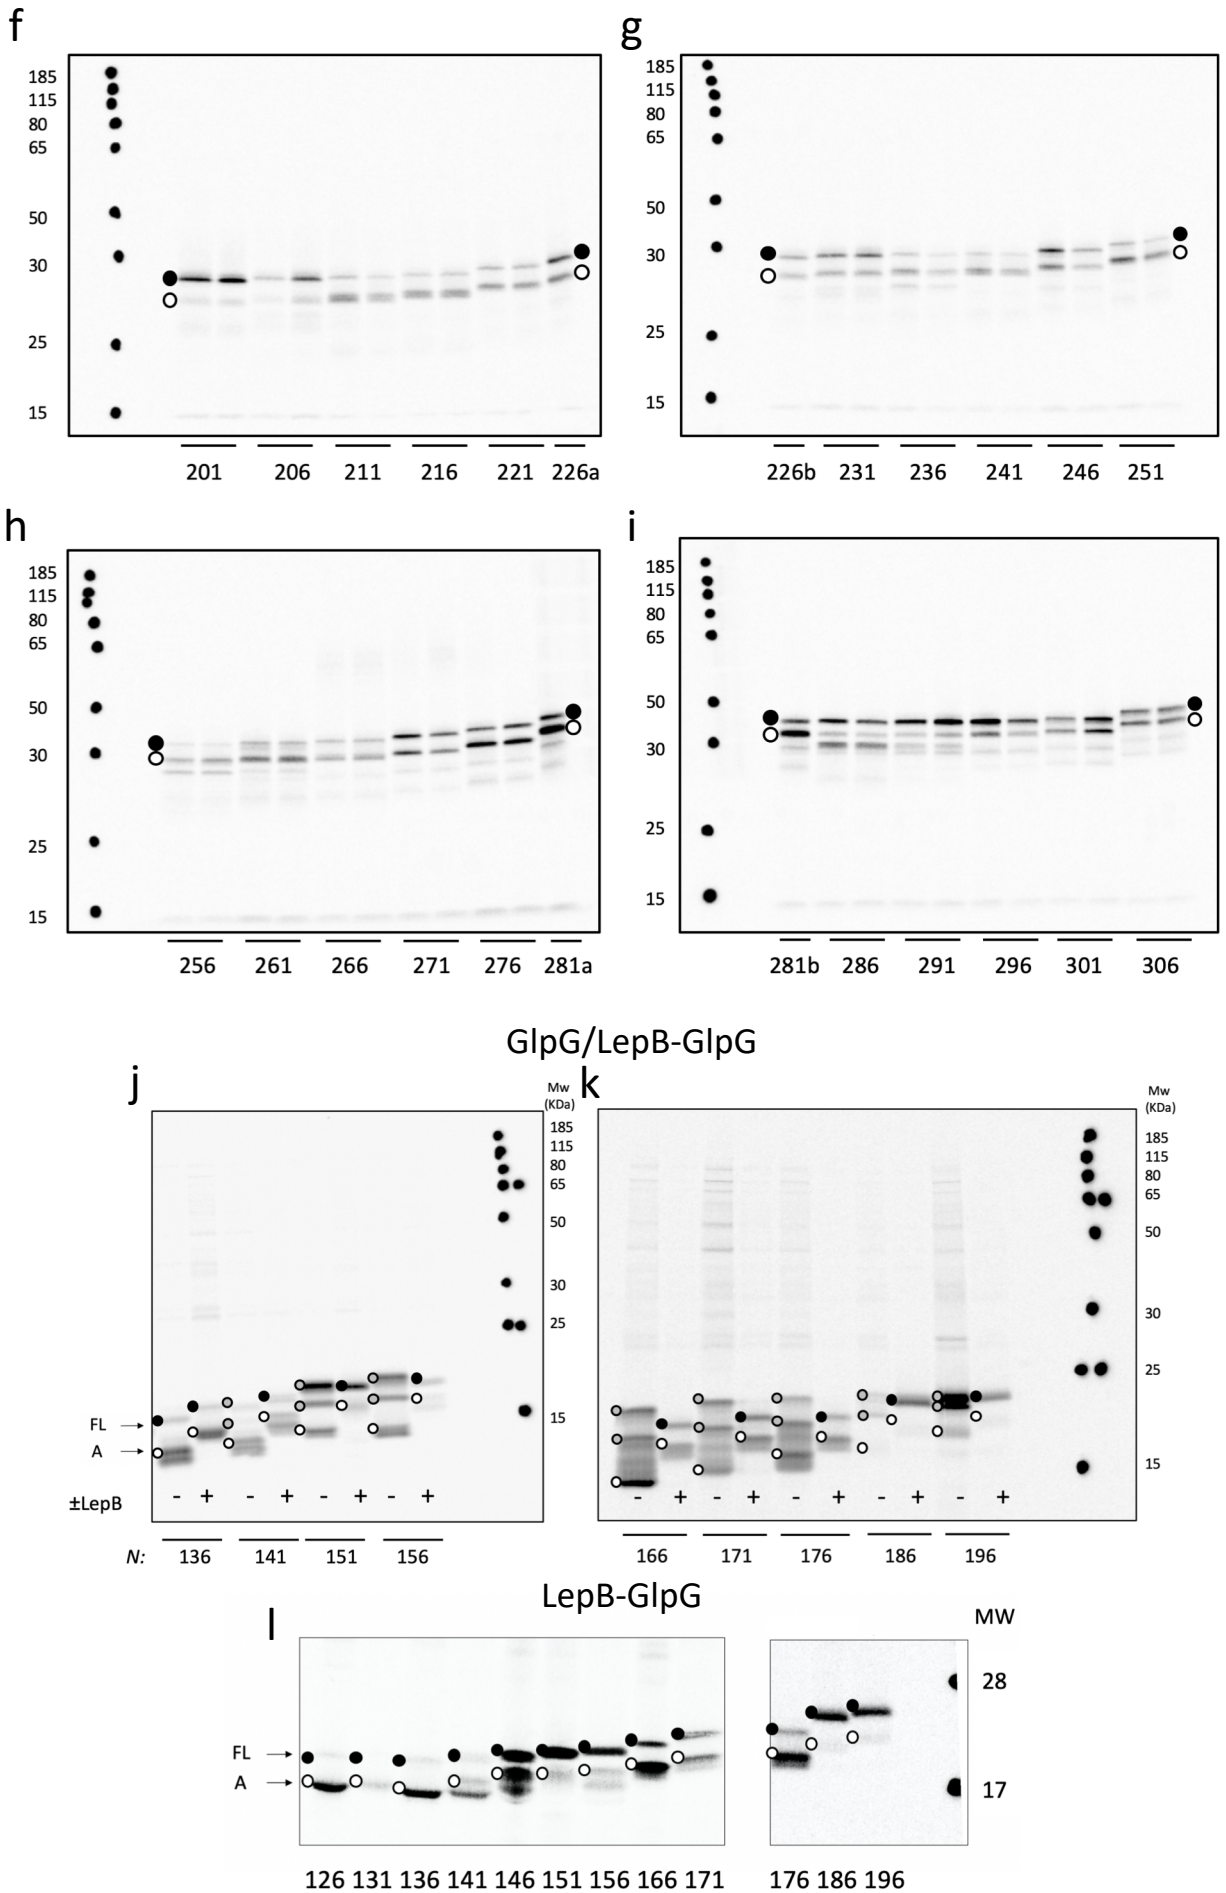

Figure 1-figure supplement 1, part 2

LepB-BtuC

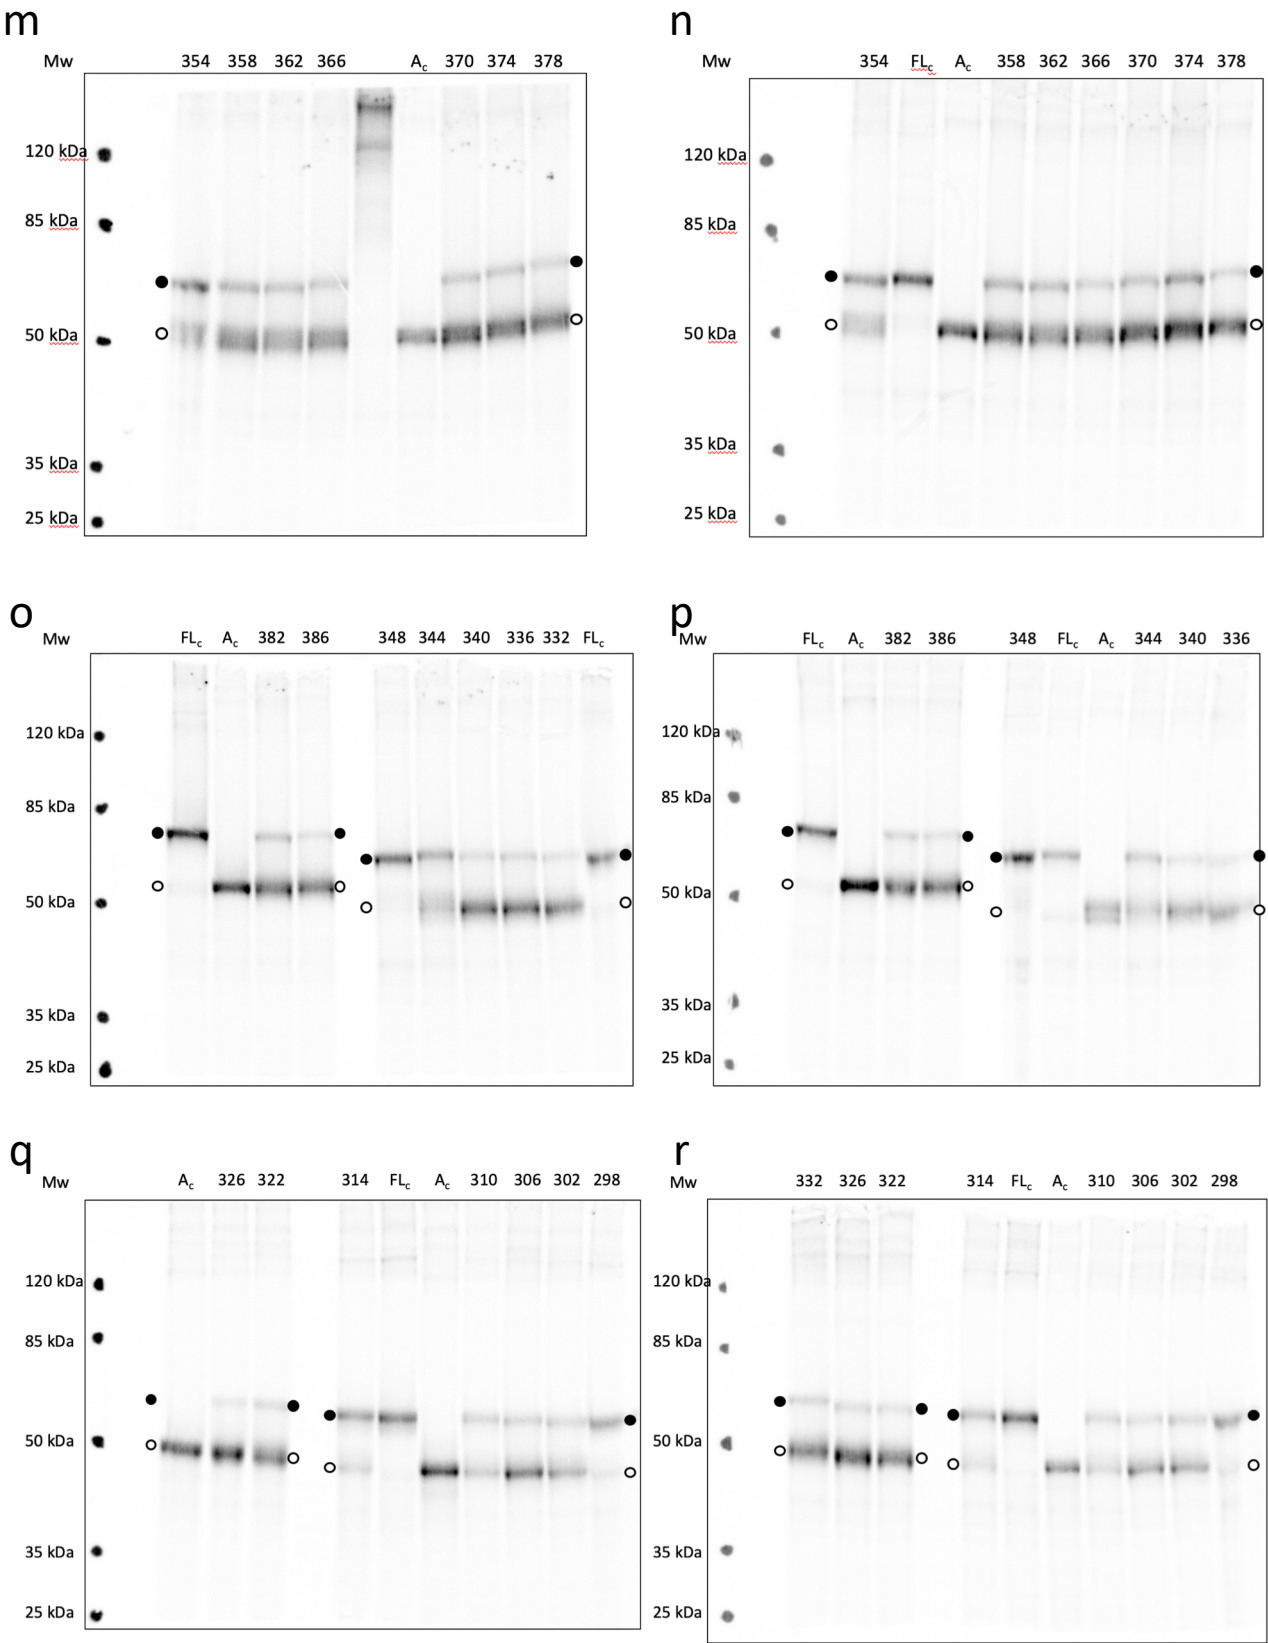

Figure 1-figure supplement 1, part 3
