# Supplementary figures and images for: Residue-by-residue analysis of cotranslational membrane protein integration in vivo
Source: eLife journal article supplement (doi:10.7554/elife.64302), 2021-02-08

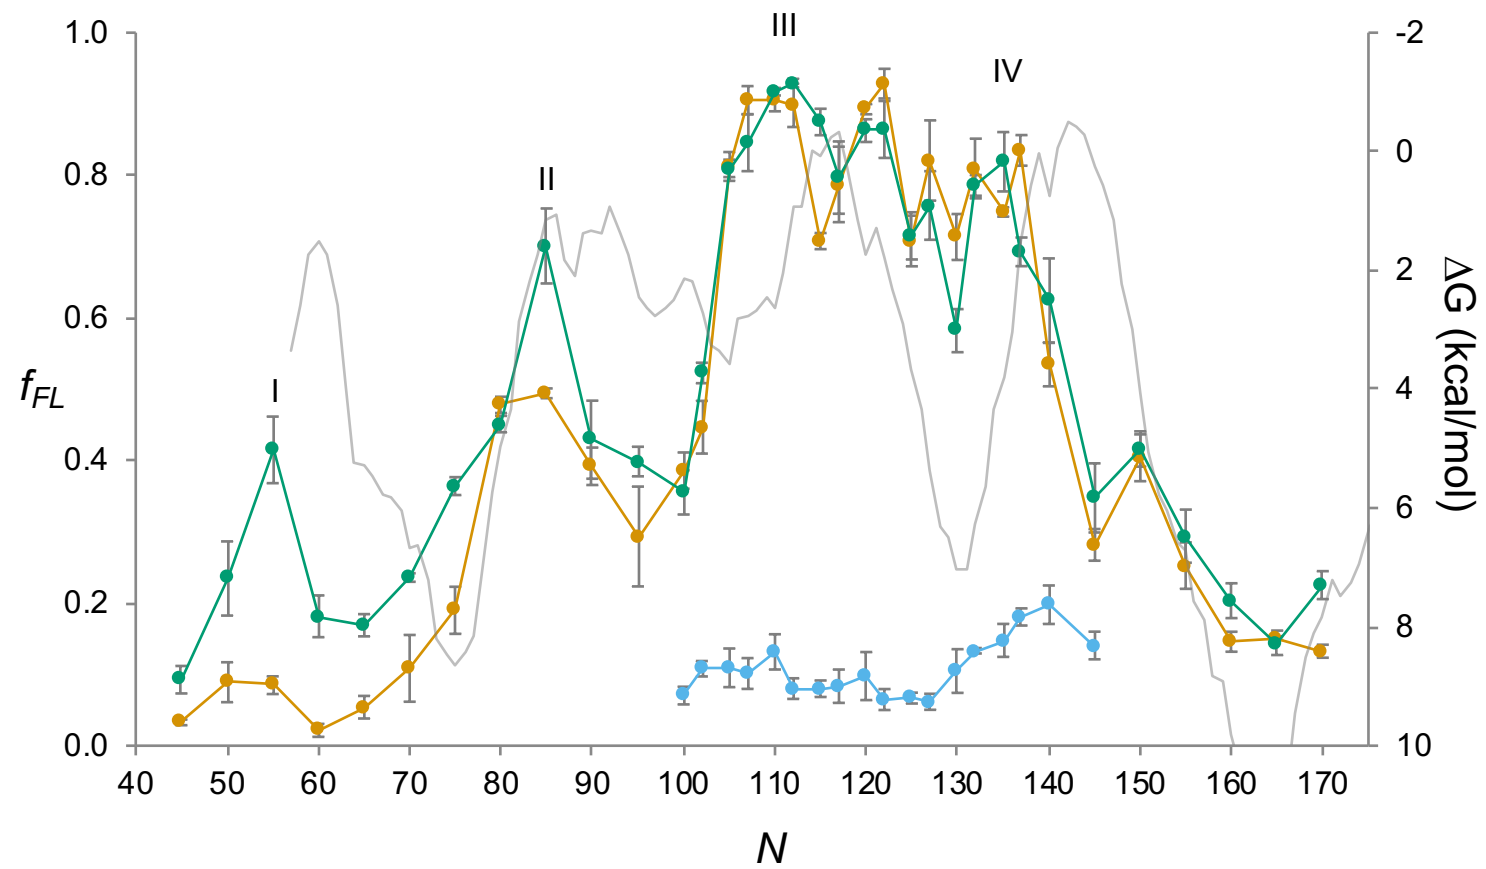

Figure 2-figure supplement 1

Supplement: supp [file elife_poa_e64302_Figure_2_figure_supplement_1.pdf › elife_poa_e64302_Figure_2_figure_supplement_1.pdf]

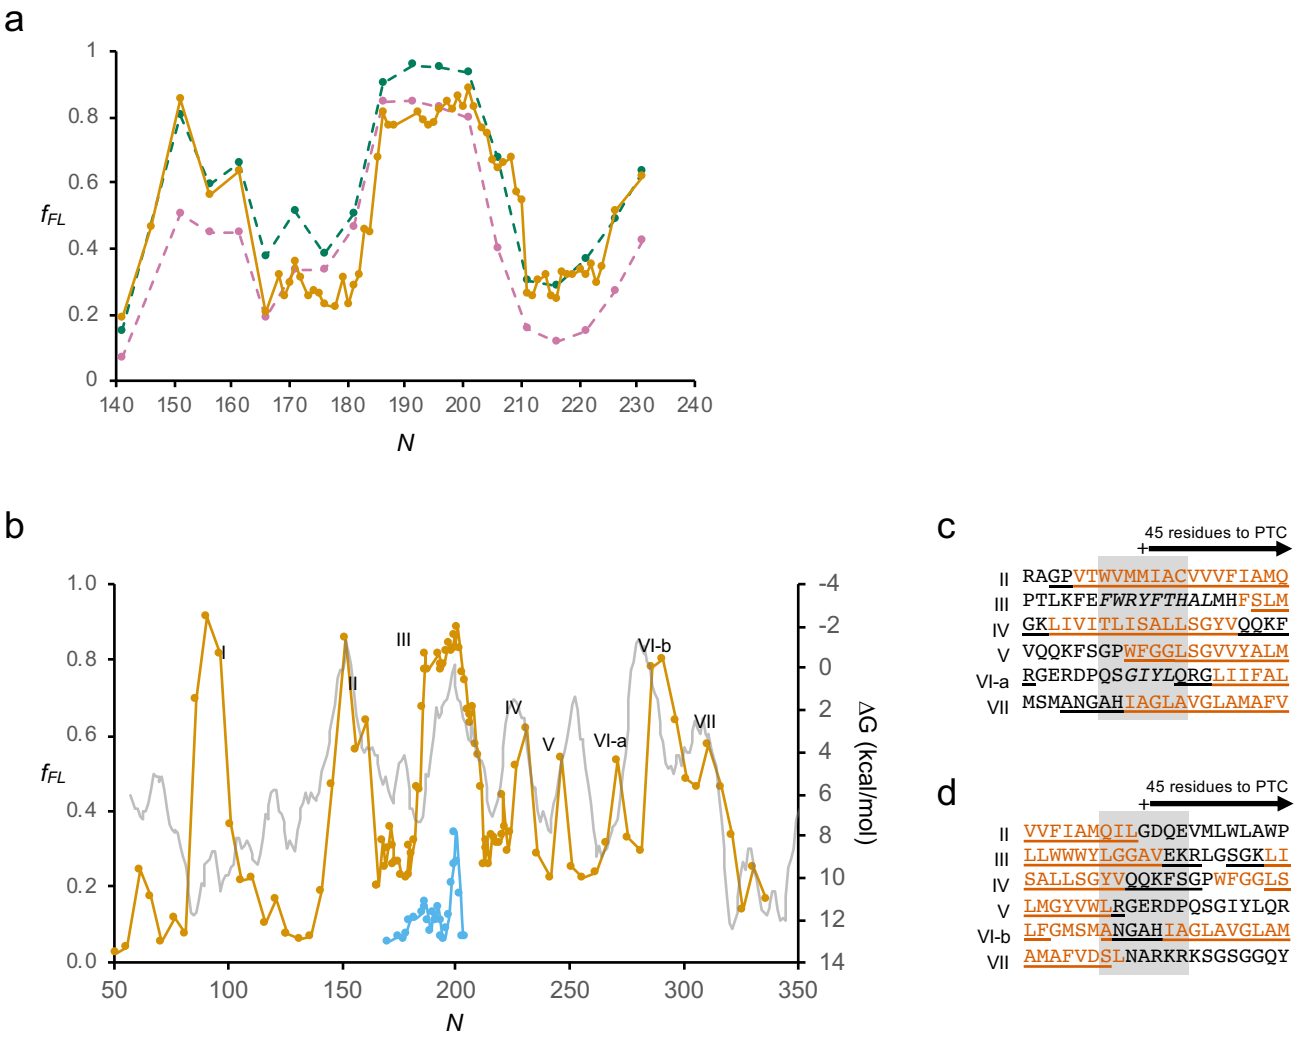

Figure 3-figure supplement 1

Supplement: supp [file elife_poa_e64302_Figure_3_figure_supplement_1.pdf › elife_poa_e64302_Figure_3_figure_supplement_1.pdf]

**a**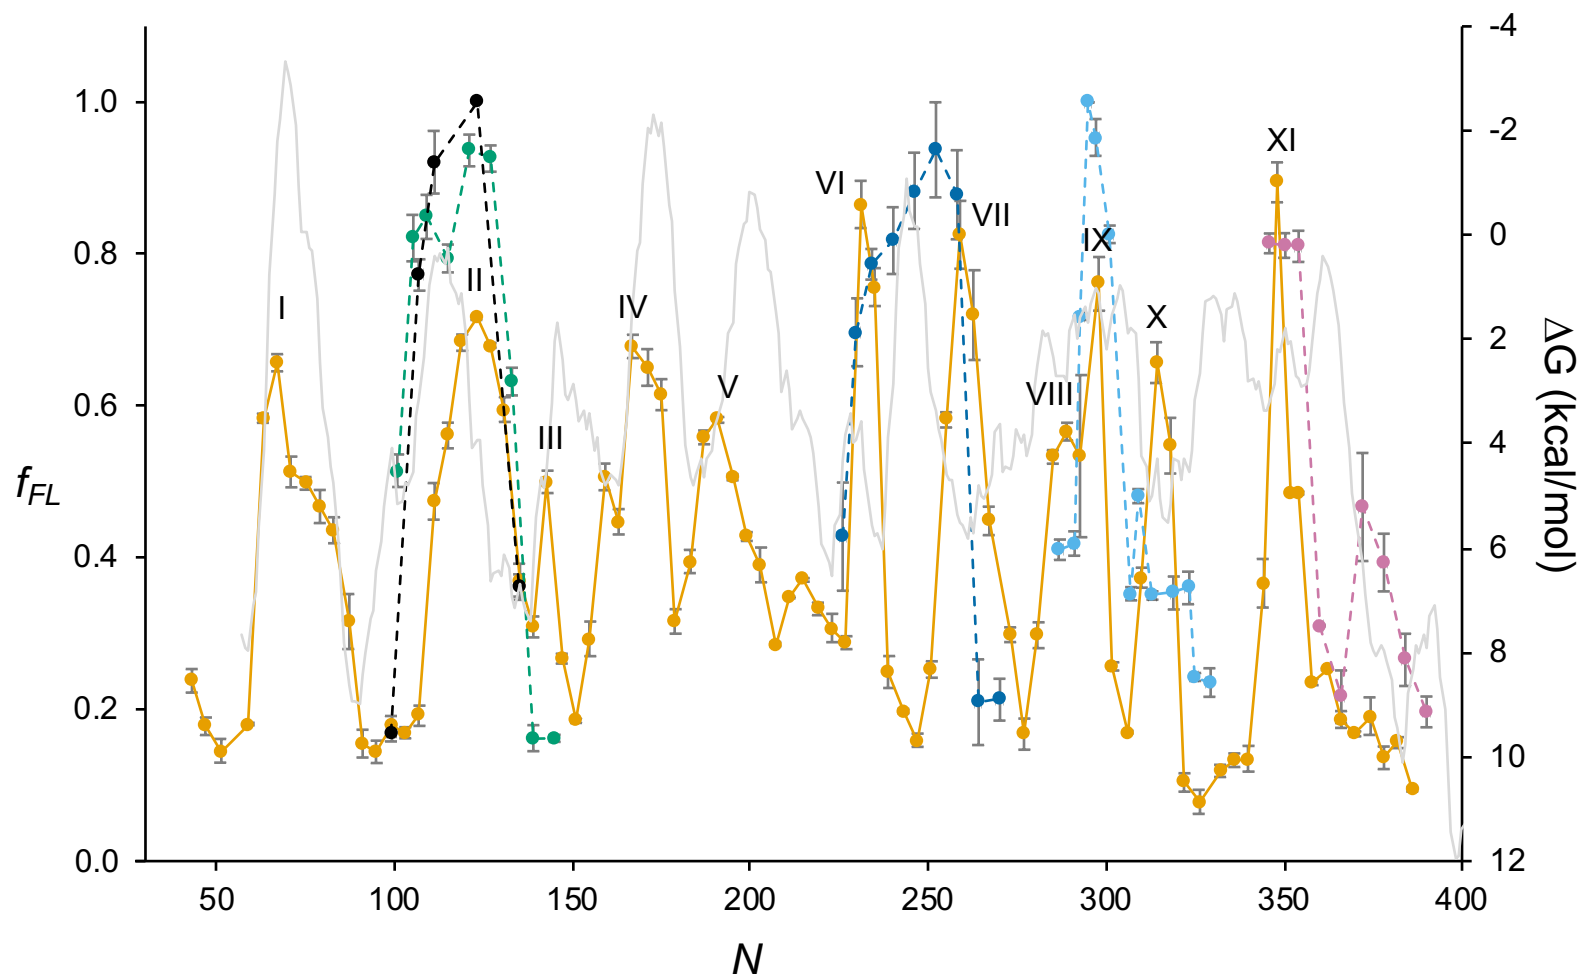**b**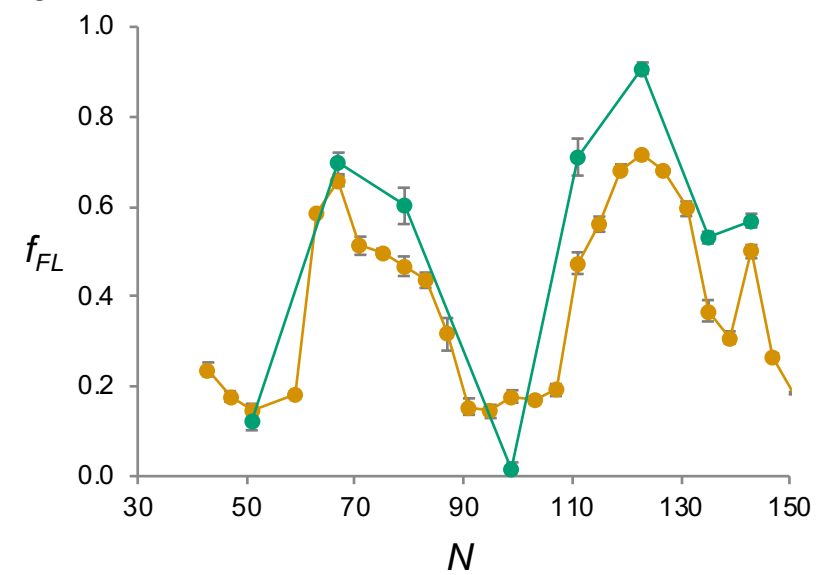

Figure 4-figure supplement 1

Supplement: supp [file elife_poa_e64302_Figure_4_figure_supplement_1.pdf › elife_poa_e64302_Figure_4_figure_supplement_1.pdf]

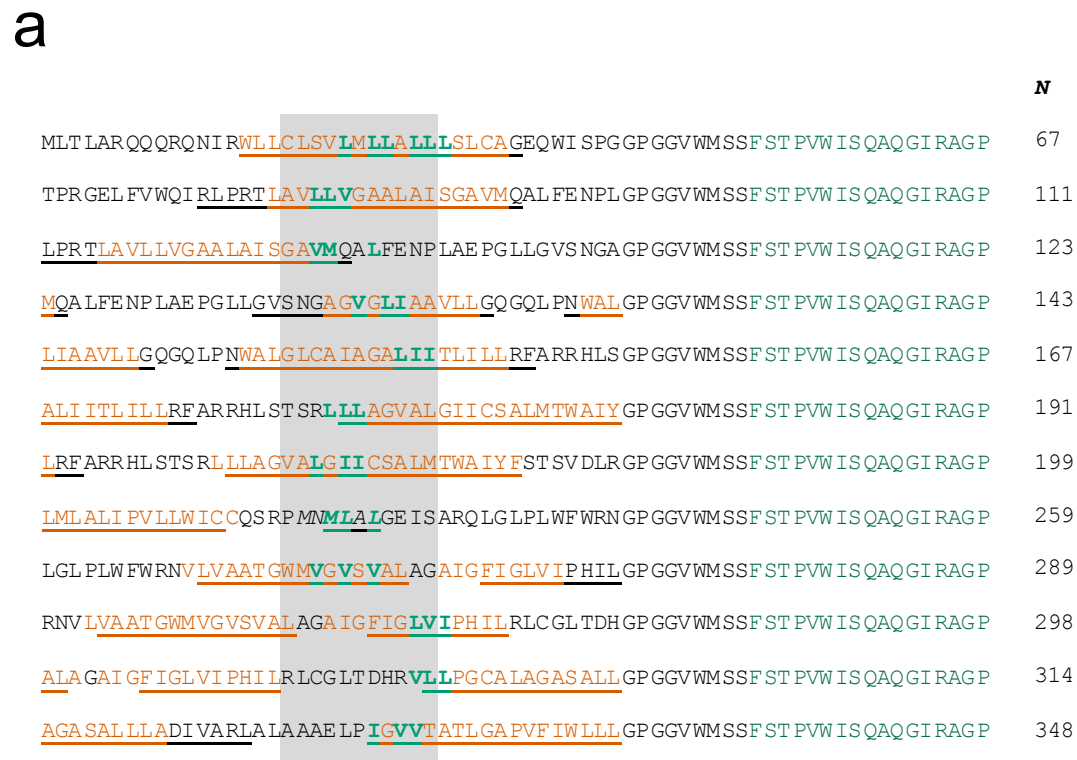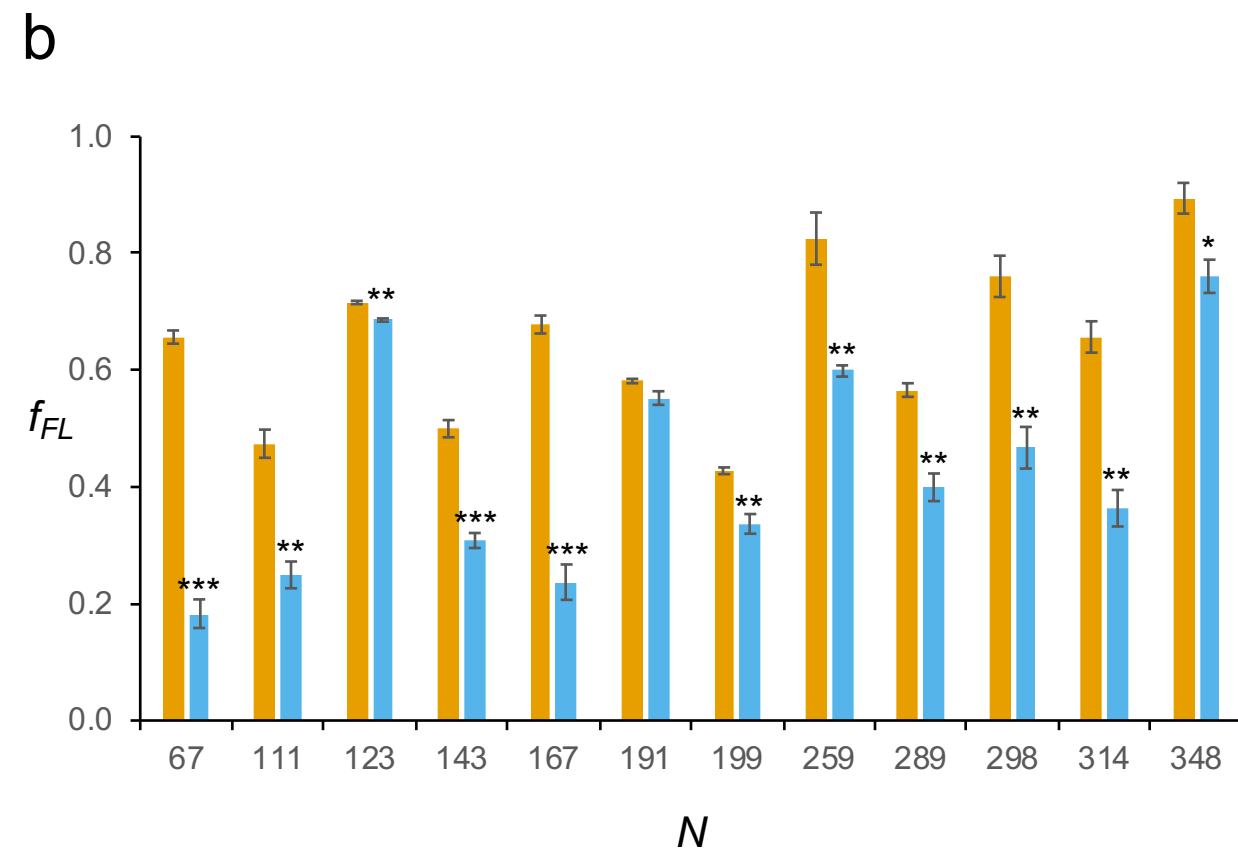

Figure 4-figure supplement 2

Supplement: supp [file elife_poa_e64302_Figure_4_figure_supplement_2.pdf › elife_poa_e64302_Figure_4_figure_supplement_2.pdf]

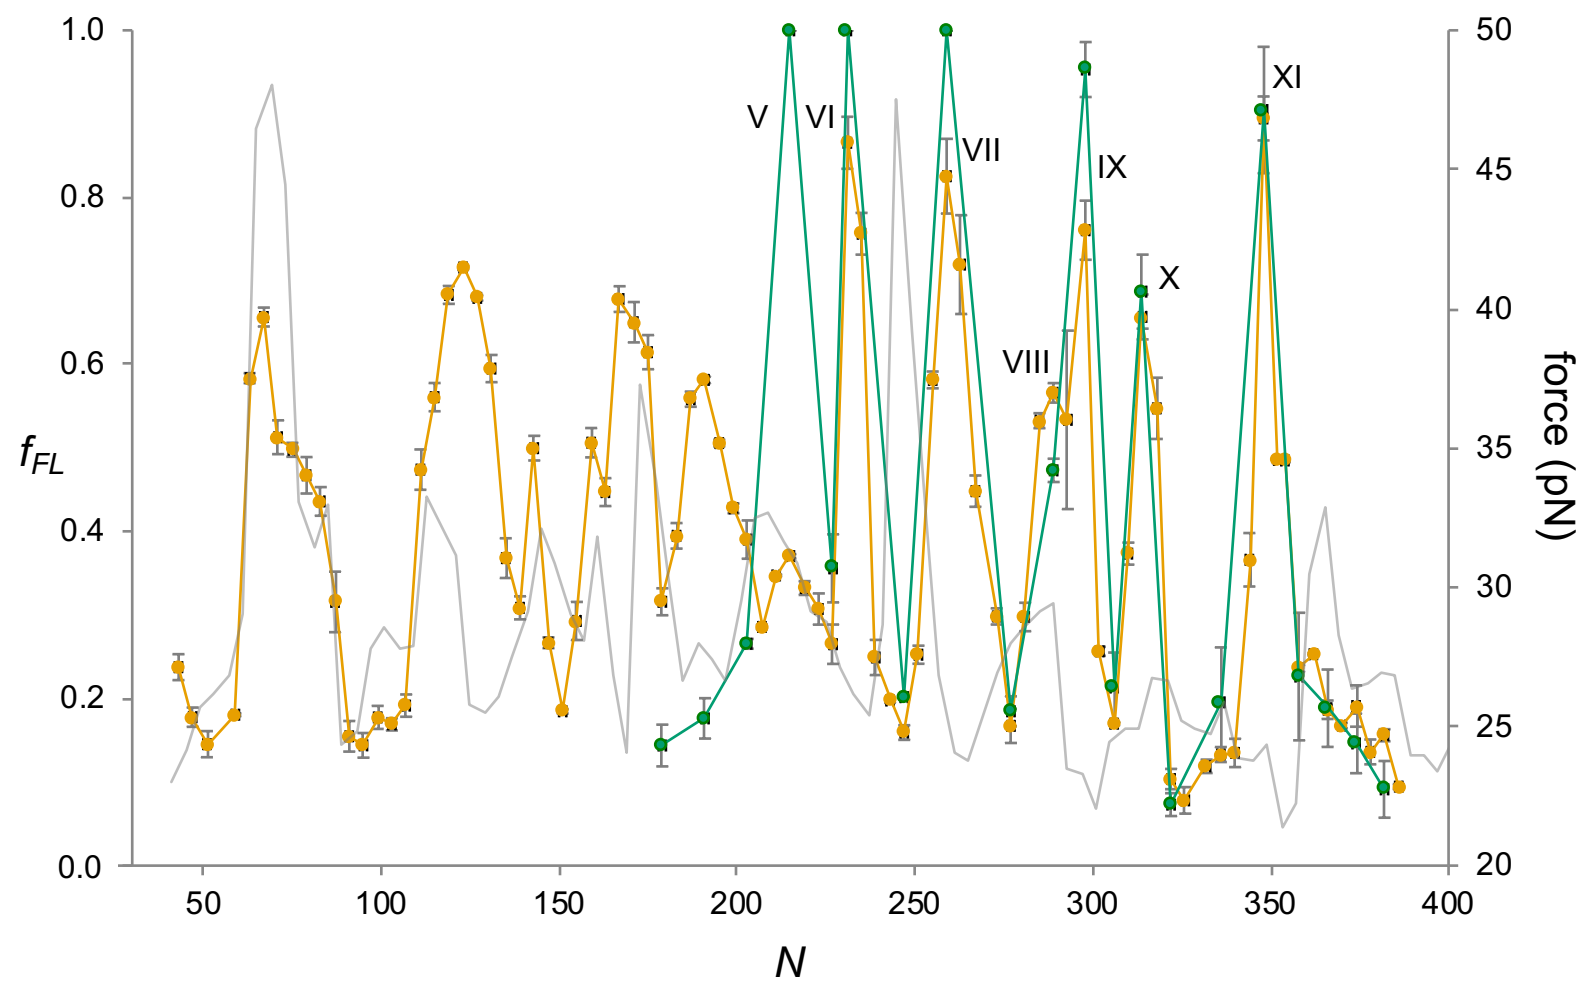

Figure 4-figure supplement 3

Supplement: supp [file elife_poa_e64302_Figure_4_figure_supplement_3.pdf › elife_poa_e64302_Figure_4_figure_supplement_3.pdf]
